# Supplementary material
Source: PubMed Central journal article supplement (PMC6939285)
Supplement: hpy169_suppl_supplementary_appendix.pdf [file hpy169_suppl_supplementary_appendix.pdf]

# Supplementary Information

## Effect Modification by Age on the Benefit or Harm of Antihypertensive Treatment for Elderly Hypertensives: A Systematic Review and Meta-analysis

Chi-Jung Huang<sup>1</sup>, Chern-En Chiang<sup>2</sup>, Bryan Williams<sup>3</sup>, Kazuomi Kario<sup>4</sup>, Shih-Hsien Sung<sup>5,6</sup>, Chen-Huan Chen<sup>6,7,8</sup>, Tzung-Dau Wang<sup>9</sup>, Hao-Min Cheng<sup>1,6,7,8,\*</sup>

<sup>1</sup>Center for Evidence-based Medicine, Taipei Veterans General Hospital, Taipei, Taiwan;

<sup>2</sup>General Clinical Research Center, Taipei Veterans General Hospital, Taipei, Taiwan;

<sup>3</sup>Institute of Cardiovascular Sciences, University College London (UCL) and National Institute for Health Research (NIHR) UCL Hospitals Biomedical Research Centre, London, UK; <sup>4</sup>Division of Cardiovascular Medicine, Department of Medicine, Jichi Medical University School of Medicine, Tochigi, Japan; <sup>5</sup>Division of Cardiology, Department of Internal Medicine, Taipei Veterans General Hospital, Taipei, Taiwan; <sup>6</sup>Department of Medicine, National Yang-Ming University, Taipei, Taiwan; <sup>7</sup>Division of Faculty Development, Department of Medical Education, Taipei Veterans General Hospital, Taipei, Taiwan; <sup>8</sup>Institute of Public Health and Community Medicine Research Center, National Yang-Ming University, Taipei, Taiwan; and <sup>9</sup>Division of Cardiology, National Taiwan University Hospital, Taipei, Taiwan

Short title: Elderly hypertension

### \*Correspondence:

Hao-Min Cheng, MD, PhD

Center for Evidence-based Medicine, Taipei Veterans General Hospital, Taipei, Taiwan

No. 201, Sec. 2, Shih-Pai Road, Beitou District, Taipei 112, Taiwan, R.O.C.

E-mail: hmcheng@vghtpe.gov.tw

Tel: (886)-2-28757434 #307

Fax: (886)-2-28757726

# Supplementary Methods

## Search strategy of relevant literature

Two electronic databases, MEDLINE and the Cochrane Library, were systematically searched without language restrictions.

### 1. MEDLINE, PreMEDLINE, and other related databases via PubMed search interface

- #1 Search "Aged"[Mesh] OR "elderly" OR "geriatric"
- #2 Search "Hypertension"[Mesh] OR "Hypertension, Malignant"[Mesh] OR "Prehypertension"[Mesh] OR "hypertensive patients"
- #3 Search "Antihypertensive Agents"[Mesh] OR "Antihypertensive Agents" [Pharmacological Action] OR "Angiotensin II Type 1 Receptor Blockers"[Mesh]
- #4 Search antihypertensive\* OR "hypertension therapy" OR "hypertensive therapy" OR "hypertension treatment" OR "hypertensive treatment" OR "blood pressure lowering" OR "blood pressure reduction" OR "blood pressure control"
- #5 Search (#1 AND #2)
- #6 Search (#3 OR #4)
- #7 Search (#5 AND #6)
- #8 Search "Myocardial Ischemia"[Mesh] OR "coronary heart disease" OR "myocardial infarction"
- #9 Search ("Stroke"[Mesh] OR "Brain Ischemia"[Mesh] OR "Intracranial Embolism and Thrombosis"[Mesh] OR "Intracranial Hemorrhages"[Mesh] OR stroke OR strokes)
- #10 Search "Heart Failure"[Mesh] OR "heart failure"
- #11 Search "Renal Insufficiency"[Mesh] OR "renal failure" OR "kidney failure"
- #12 Search ("Dementia"[Mesh] OR "Dementia, Multi-Infarct"[Mesh] OR "Dementia, Vascular"[Mesh] OR dementia)
- #13 Search "Cognitive Dysfunction"[Mesh]
- #14 Search (#8 OR #9 OR #10 OR #11 OR #12 OR #13)
- #15 Search (#7 AND #14) Filters: Clinical Trial; Controlled Clinical Trial; Randomized Controlled Trial

### 2. Cochrane Library via Wiley search interface

- #1 MeSH descriptor: [Aged] explode all trees
- #2 elderly or geriatric:ti,ab,kw (Word variations have been searched)
- #3 #1 or #2
- #4 MeSH descriptor: [Hypertension] explode all trees
- #5 MeSH descriptor: [Prehypertension] explode all trees
- #6 hypertensive patients:ti,ab,kw (Word variations have been searched)
- #7 #4 or #5 or #6
- #8 #3 and #7
- #9 MeSH descriptor: [Antihypertensive Agents] explode all trees
- #10 antihypertensive or "hypertension therapy" or "hypertensive therapy" or "hypertension treatment" or "hypertensive treatment" or "blood pressure lowering" or "blood pressure reduction" or "blood pressure control":ti,ab,kw (Word variations have been searched)
- #11 #9 or #10

#12 MeSH descriptor: [Myocardial Ischemia] explode all trees  
#13 coronary heart disease or "myocardial infarction":ti,ab,kw (Word variations have been searched)  
#14 #12 or #13  
#15 MeSH descriptor: [Stroke] explode all trees  
#16 MeSH descriptor: [Brain Ischemia] explode all trees  
#17 MeSH descriptor: [Intracranial Embolism and Thrombosis] explode all trees  
#18 MeSH descriptor: [Intracranial Hemorrhages] explode all trees  
#19 stroke or strokes:ti,ab,kw (Word variations have been searched)  
#20 #15 or #16 or #17 or #18 or #19  
#21 MeSH descriptor: [Heart Failure] explode all trees  
#22 heart failure:ti,ab,kw (Word variations have been searched)  
#23 #21 or #22  
#24 MeSH descriptor: [Renal Insufficiency] explode all trees  
#25 renal failure or "kidney failure":ti,ab,kw (Word variations have been searched)  
#26 #24 or #25  
#27 MeSH descriptor: [Dementia] explode all trees  
#28 MeSH descriptor: [Dementia, Vascular] explode all trees  
#29 MeSH descriptor: [Dementia, Multi-Infarct] explode all trees  
#30 dementia:ti,ab,kw (Word variations have been searched)  
#31 #27 or #28 or #29 or #30  
#32 MeSH descriptor: [Cognition Disorders] explode all trees  
#33 #14 or #20 or #23 or #26 or #31 or #32  
#34 #8 and #11 and #33 in Trials

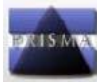

## Supplementary Table 1. PRISMA Checklist

| Section/topic                      | #  | Checklist item                                                                                                                                                                                                                                                                                              | Reported on page #  |
|------------------------------------|----|-------------------------------------------------------------------------------------------------------------------------------------------------------------------------------------------------------------------------------------------------------------------------------------------------------------|---------------------|
| <b>TITLE</b>                       |    |                                                                                                                                                                                                                                                                                                             |                     |
| Title                              | 1  | Identify the report as a systematic review, meta-analysis, or both.                                                                                                                                                                                                                                         | 1                   |
| <b>ABSTRACT</b>                    |    |                                                                                                                                                                                                                                                                                                             |                     |
| Structured summary                 | 2  | Provide a structured summary including, as applicable: background; objectives; data sources; study eligibility criteria, participants, and interventions; study appraisal and synthesis methods; results; limitations; conclusions and implications of key findings; systematic review registration number. | 3-4                 |
| <b>INTRODUCTION</b>                |    |                                                                                                                                                                                                                                                                                                             |                     |
| Rationale                          | 3  | Describe the rationale for the review in the context of what is already known.                                                                                                                                                                                                                              | 5                   |
| Objectives                         | 4  | Provide an explicit statement of questions being addressed with reference to participants, interventions, comparisons, outcomes, and study design (PICOS).                                                                                                                                                  | 5                   |
| <b>METHODS</b>                     |    |                                                                                                                                                                                                                                                                                                             |                     |
| Protocol and registration          | 5  | Indicate if a review protocol exists, if and where it can be accessed (e.g., Web address), and, if available, provide registration information including registration number.                                                                                                                               | 6                   |
| Eligibility criteria               | 6  | Specify study characteristics (e.g., PICOS, length of follow-up) and report characteristics (e.g., years considered, language, publication status) used as criteria for eligibility, giving rationale.                                                                                                      | 6                   |
| Information sources                | 7  | Describe all information sources (e.g., databases with dates of coverage, contact with study authors to identify additional studies) in the search and date last searched.                                                                                                                                  | 6                   |
| Search                             | 8  | Present full electronic search strategy for at least one database, including any limits used, such that it could be repeated.                                                                                                                                                                               | 6 & Suppl. Methods  |
| Study selection                    | 9  | State the process for selecting studies (i.e., screening, eligibility, included in systematic review, and, if applicable, included in the meta-analysis).                                                                                                                                                   | 6 & Suppl. Figure 1 |
| Data collection process            | 10 | Describe method of data extraction from reports (e.g., piloted forms, independently, in duplicate) and any processes for obtaining and confirming data from investigators.                                                                                                                                  | 7                   |
| Data items                         | 11 | List and define all variables for which data were sought (e.g., PICOS, funding sources) and any assumptions and simplifications made.                                                                                                                                                                       | 7                   |
| Risk of bias in individual studies | 12 | Describe methods used for assessing risk of bias of individual studies (including specification of whether this was done at the study or outcome level), and how this information is to be used in any data synthesis.                                                                                      | 8                   |
| Summary measures                   | 13 | State the principal summary measures (e.g., risk ratio, difference in means).                                                                                                                                                                                                                               | 8                   |
| Synthesis of results               | 14 | Describe the methods of handling data and combining results of studies, if done, including measures of consistency (e.g., $I^2$ ) for each meta-analysis.                                                                                                                                                   | 8                   |

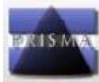

## Supplementary Table 1. PRISMA Checklist

| Section/topic                 | #  | Checklist item                                                                                                                                                                                           | Reported on page #                   |
|-------------------------------|----|----------------------------------------------------------------------------------------------------------------------------------------------------------------------------------------------------------|--------------------------------------|
| Risk of bias across studies   | 15 | Specify any assessment of risk of bias that may affect the cumulative evidence (e.g., publication bias, selective reporting within studies).                                                             | 8                                    |
| Additional analyses           | 16 | Describe methods of additional analyses (e.g., sensitivity or subgroup analyses, meta-regression), if done, indicating which were pre-specified.                                                         | 8-9                                  |
| <b>RESULTS</b>                |    |                                                                                                                                                                                                          |                                      |
| Study selection               | 17 | Give numbers of studies screened, assessed for eligibility, and included in the review, with reasons for exclusions at each stage, ideally with a flow diagram.                                          | 10                                   |
| Study characteristics         | 18 | For each study, present characteristics for which data were extracted (e.g., study size, PICOS, follow-up period) and provide the citations.                                                             | 10 & Table 1                         |
| Risk of bias within studies   | 19 | Present data on risk of bias of each study and, if available, any outcome level assessment (see item 12).                                                                                                | 10 & 13                              |
| Results of individual studies | 20 | For all outcomes considered (benefits or harms), present, for each study: (a) simple summary data for each intervention group (b) effect estimates and confidence intervals, ideally with a forest plot. | Figure 2, Figure 4 & Suppl. Figure 6 |
| Synthesis of results          | 21 | Present results of each meta-analysis done, including confidence intervals and measures of consistency.                                                                                                  | 11-13                                |
| Risk of bias across studies   | 22 | Present results of any assessment of risk of bias across studies (see Item 15).                                                                                                                          | 10 & 13                              |
| Additional analysis           | 23 | Give results of additional analyses, if done (e.g., sensitivity or subgroup analyses, meta-regression [see Item 16]).                                                                                    | 11-13                                |
| <b>DISCUSSION</b>             |    |                                                                                                                                                                                                          |                                      |
| Summary of evidence           | 24 | Summarize the main findings including the strength of evidence for each main outcome; consider their relevance to key groups (e.g., healthcare providers, users, and policy makers).                     | 14-17                                |
| Limitations                   | 25 | Discuss limitations at study and outcome level (e.g., risk of bias), and at review-level (e.g., incomplete retrieval of identified research, reporting bias).                                            | 17-18                                |
| Conclusions                   | 26 | Provide a general interpretation of the results in the context of other evidence, and implications for future research.                                                                                  | 18                                   |
| <b>FUNDING</b>                |    |                                                                                                                                                                                                          |                                      |
| Funding                       | 27 | Describe sources of funding for the systematic review and other support (e.g., supply of data); role of funders for the systematic review.                                                               | 20                                   |

From: Moher D, Liberati A, Tetzlaff J, Altman DG, The PRISMA Group (2009). Preferred Reporting Items for Systematic Reviews and Meta-Analyses: The PRISMA Statement. PLoS Med 6(6): e1000097. doi:10.1371/journal.pmed1000097

For more information, visit: [www.prisma-statement.org](http://www.prisma-statement.org).

Page 2 of 2

**Supplementary Table 2. Definition of renal failure in 7 trials reporting renal outcome**

| Trial            | Definition                                                                                                                                                                                                                                                                                                                                                                                                                                                                      |
|------------------|---------------------------------------------------------------------------------------------------------------------------------------------------------------------------------------------------------------------------------------------------------------------------------------------------------------------------------------------------------------------------------------------------------------------------------------------------------------------------------|
| EWPHE, 1985      | Renal events: severe increase in serum creatinine                                                                                                                                                                                                                                                                                                                                                                                                                               |
| JATOS, 2008      | Acute or chronic renal failure: doubling of the serum creatinine concentration to a value of 1.5 mg/dL or higher                                                                                                                                                                                                                                                                                                                                                                |
| SHEP, 1991       | Renal dysfunction: serum creatinine concentration greater than 265.2 $\mu\text{mol/L}$                                                                                                                                                                                                                                                                                                                                                                                          |
| SPRINT, 2016     | Chronic kidney disease (1) for participants with CKD at baseline (estimated glomerular filtration rate [eGFR] $<60 \text{ ml/min/1.73 m}^2$ ): a $\geq 50\%$ reduction in eGFR (measured twice at least 90 days apart), dialysis, or a kidney transplant; (2) for participants without CKD at baseline: a $\geq 30\%$ reduction in eGFR from baseline to an end value of $<60 \text{ mL/min/1.73m}^2$ (measured twice at least 90 days apart), dialysis, or a kidney transplant |
| Syst-China, 1998 | Renal failure/renal insufficiency: on 2 consecutive visits the serum creatinine levels showed a 2-fold increase compared to initial values or reached $360 \mu\text{mol/L}$ ( $4.0 \text{ mg/dL}$ )                                                                                                                                                                                                                                                                             |
| Syst-Eur, 1997   | Renal failure/renal insufficiency: at 2 consecutive visits the serum creatinine concentration reached or exceeded $360 \mu\text{mol/L}$ ( $4.0 \text{ mg/dL}$ ) or doubled compared with the concentration at randomization                                                                                                                                                                                                                                                     |
| VALISH, 2010     | Renal dysfunction: doubling of serum creatinine to a level over $2.0 \text{ mg/dL}$ or introduction of dialysis                                                                                                                                                                                                                                                                                                                                                                 |

**Supplementary Table 3. Outcomes assessed during blood pressure (BP)-lowering treatment, comparing intensive versus standard blood-pressure control in hypertensive adults ≥60 years of age**

| Trial             | Year       | CHD<br>(n/N) |          | Stroke<br>(n/N) |           | HF<br>(n/N) |          | CV death<br>(n/N) |          | MACE<br>(n/N) |          | RF<br>(n/N) |          | All-cause death<br>(n/N) |          | Cognitive decline<br>(n/N) |          | Dementia<br>(n/N) |          |
|-------------------|------------|--------------|----------|-----------------|-----------|-------------|----------|-------------------|----------|---------------|----------|-------------|----------|--------------------------|----------|----------------------------|----------|-------------------|----------|
|                   |            | Intensive    | Standard | Intensive       | Standard  | Intensive   | Standard | Intensive         | Standard | Intensive     | Standard | Intensive   | Standard | Intensive                | Standard | Intensive                  | Standard | Intensive         | Standard |
| ASCOT-BPLA        | 2011       | 211/4042     | 219/4095 | 198/4042        | 282/4095  | 90/4042     | 113/4095 | 169/4042          | 221/4095 | 739/4042      | 886/4095 |             |          | 492/4042                 | 540/4095 |                            |          |                   |          |
| EWPHE             | 1985       | 17/416       | 29/424   | 12/416          | 19/424    | 7/416       | 17/424   | 67/416            | 93/424   | 42/416        | 61/424   | 4/416       | 1/424    | 135/416                  | 149/424  |                            |          |                   |          |
| FEVER             | 2011       |              |          | 67/1631*        | 122/1548* |             |          | 27/1631†          | 50/1548† |               |          |             |          | 50/1631†                 | 74/1548† |                            |          |                   |          |
| HEP               | 1986       | 35/419       | 38/465   | 20/419          | 39/465    | 22/419      | 36/465   | 35/419            | 50/465   |               |          |             |          | 60/419                   | 69/465   |                            |          |                   |          |
| HYVET pilot       | 2003       |              |          | 6/426           | 18/426    |             |          | 23/426            | 19/426   |               |          |             |          | 30/426                   | 22/426   |                            |          |                   |          |
|                   |            |              |          | 12/431          | 18/426    |             |          | 22/431            | 19/426   |               |          |             |          | 27/431                   | 22/426   |                            |          |                   |          |
| HYVET             | 2008       | 9/1933       | 12/1912  | 51/1933         | 69/1912   | 22/1933     | 57/1912  | 99/1933           | 121/1912 | 138/1933      | 193/1912 |             |          | 196/1933                 | 235/1912 |                            |          |                   |          |
| HYVET-COG         | 2008       |              |          |                 |           |             |          |                   |          |               |          |             |          |                          |          | 485/1687                   | 486/1649 | 126/1687          | 137/1649 |
| JATOS             | 2008       | 7/2212       | 7/2206   | 44/2212         | 42/2206   | 8/2212      | 7/2206   | 9/2212            | 8/2206   | 59/2212       | 56/2206  | 8/2212      | 9/2206   | 54/2212                  | 42/2206  |                            |          |                   |          |
| MRC-2             | 1992       | 128/2183     | 159/2213 | 101/2183        | 134/2213  |             |          | 161/2183          | 180/2213 | 258/2183      | 309/2213 |             |          | 301/2183                 | 315/2213 |                            |          |                   |          |
| SCOPE             | 2003       | 70/2477      | 63/2460  | 89/2477         | 115/2460  |             |          | 145/2477          | 152/2460 | 242/2477      | 268/2460 |             |          | 259/2477                 | 266/2460 | 113/2416                   | 125/2409 | 62/2477           | 57/2460  |
| SHEP pilot        | 1989       | 15/443       | 4/108    | 11/443          | 6/108     | 6/443       | 2/108    | 14/443            | 5/108    | 44/443        | 20/108   |             |          | 32/443                   | 7/108    |                            |          |                   |          |
| SHEP              | 1991, 2001 | 104/2365     | 141/2371 | 103/2365        | 159/2371  | 55/2365     | 105/2371 | 90/2365           | 112/2371 | 199/2365      | 289/2371 | 7/2365      | 11/2371  | 213/2365                 | 242/2371 | 12/1368‡                   | 17/1317‡ | 37/2365           | 44/2371  |
| SPRINT            | 2016       | 37/1317      | 53/1319  | 27/1317         | 34/1319   | 35/1317     | 56/1319  | 18/1317           | 29/1319  | 102/1317      | 148/1319 | 44/1310     | 17/1309  | 73/1317                  | 107/1319 |                            |          |                   |          |
| STONE§            | 1996       | 2/787        | 2/740    | 16/801          | 36/774    | 2/787       | 6/744    | 11/796            | 14/752   | 24/809        | 59/797   |             |          | 15/800                   | 26/764   |                            |          |                   |          |
| STOP-Hypertension | 1991       | 25/812       | 28/815   | 29/812          | 53/815    | 19/812      | 39/815   | 17/812            | 41/815   | 58/812        | 94/815   |             |          | 36/812                   | 63/815   |                            |          |                   |          |
| Syst-China        | 1998       | 9/1253       | 7/1141   | 45/1253         | 59/1141   | 4/1253      | 8/1141   | 33/1253           | 44/1141  | 74/1253       | 94/1141  | 3/1253      | 1/1141   | 61/1253                  | 82/1141  |                            |          |                   |          |
| Syst-Eur          | 1997, 2002 | 33/2398      | 45/2297  | 47/2398         | 77/2297   | 37/2398     | 49/2297  | 59/2398           | 77/2297  | 137/2398      | 186/2297 | 3/2398      | 2/2297   | 123/2398                 | 137/2297 |                            |          |                   |          |
| VALISH            | 2010       | 5/1545       | 4/1534   | 16/1545         | 23/1534   |             |          | 11/1545           | 11/1534  | 32/1545       | 37/1534  | 5/1545      | 2/1534   | 24/1545                  | 30/1534  |                            |          |                   |          |
| Wei et al         | 2013       | 9/363        | 9/361    | 21/363          | 36/361    | 6/363       | 16/361   | 25/363            | 50/361   | 40/363        | 67/361   |             |          | 51/363                   | 87/361   |                            |          | 21/1485           | 43/1417  |

CHD, coronary heart disease; CV, cardiovascular; HF, heart failure; MACE, major adverse cardiovascular events; RF, renal failure

\*The number of incident cases was estimated by the incidence rate (events/1000 person-years), given participant numbers and follow-up period of the trial.

†The number of incident cases was estimated by the hazard ratio, referred to as the risk ratio, and its confidence interval, given participant numbers in the intensive and standard control groups.

‡The number of incident cases was estimated by multiplying the number of participants by the cumulative incidence in follow-up year 4.

§Total sample sizes vary among outcomes since each one considered the numbers of subjects with no terminating event that were constant.

**Supplementary Table 4. Adverse side effects reported during blood pressure (BP)-lowering treatment**

| Trial     | Year | Falls<br>(n/N) |          | Fractures<br>(n/N) |          | Syncope<br>(n/N) |          | Hypotension<br>(n/N) |          | Electrolyte abnormality<br>(n/N) |          |
|-----------|------|----------------|----------|--------------------|----------|------------------|----------|----------------------|----------|----------------------------------|----------|
|           |      | Intensive      | Standard | Intensive          | Standard | Intensive        | Standard | Intensive            | Standard | Intensive                        | Standard |
| HYVET*    | 2010 |                |          | 38/1933            | 52/1912  |                  |          |                      |          |                                  |          |
| SCOPE     | 2003 |                |          |                    |          |                  |          | 609/2477             | 576/2460 |                                  |          |
| SHEP      | 1991 | 303/2365       | 247/2371 | 57/2365            | 47/2371  | 52/2365          | 31/2371  |                      |          |                                  |          |
| SPRINT    | 2016 | 65/1317        | 73/1319  |                    |          | 39/1317          | 32/1319  | 32/1317              | 19/1319  | 53/1317                          | 36/1319  |
| Wei et al | 2013 |                |          | 3/363              | 5/361    |                  |          |                      |          |                                  |          |

\*Data on fracture events for HYVET was from the report in 2010<sup>1</sup>.



**Supplementary Table 5. GRADE summary of findings: Intensive BP control of <140 mmHg compared to standard BP control of 140-150 mmHg for adverse vascular events**

| Outcome (studies)                                              | No of participants (%) |                   | Effect (95% CI)           |                                                  | Quality of the evidence (GRADE) <sup>†</sup>     |
|----------------------------------------------------------------|------------------------|-------------------|---------------------------|--------------------------------------------------|--------------------------------------------------|
|                                                                | Intensive control      | Standard control  | Relative*                 | Absolute                                         |                                                  |
| Coronary heart disease (4 RCTs)<br>follow up: median 3.4 years | 232/8162 (2.8%)        | 239/8196 (2.9%)   | RR 0.98<br>(0.82 to 1.17) | 1 fewer per 1,000<br>(from 5 fewer to 5 more)    | ⊕⊕⊕○<br>MODERATE due to imprecision              |
| Stroke (5 RCTs)<br>follow up: median 3.3 years                 | 346/9793 (3.5%)        | 505/9744 (5.2%)   | RR 0.68<br>(0.55 to 0.85) | 17 fewer per 1,000<br>(from 8 fewer to 23 fewer) | ⊕⊕⊕⊕<br>HIGH                                     |
| Heart failure (3 RCTs)<br>follow up: median 4.0 years          | 104/6617 (1.6%)        | 136/6662 (2.0%)   | RR 0.74<br>(0.46 to 1.18) | 5 fewer per 1,000<br>(from 4 more to 11 fewer)   | ⊕⊕⊕○<br>MODERATE due to imprecision              |
| Cardiovascular death (5 RCTs)<br>follow up: median 3.3 years   | 241/9793 (2.5%)        | 340/9744 (3.5%)   | RR 0.68<br>(0.52 to 0.89) | 11 fewer per 1,000<br>(from 4 fewer to 17 fewer) | ⊕⊕⊕⊕<br>HIGH                                     |
| MACE (4 RCTs)<br>follow up: median 3.4 years                   | 870/8162 (10.7%)       | 1046/8196 (12.8%) | RR 0.83<br>(0.69 to 0.99) | 22 fewer per 1,000<br>(from 1 fewer to 40 fewer) | ⊕⊕⊕⊕<br>HIGH                                     |
| Renal Failure (2 RCTs)<br>follow up: median 2.4 years          | 13/3757 (0.3%)         | 11/3740 (0.3%)    | RR 1.19<br>(0.48 to 2.94) | 1 more per 1,000<br>(from 2 fewer to 6 more)     | ⊕⊕○○<br>LOW due to very serious imprecision      |
| All-cause death (5 RCTs)<br>follow up: median 3.3 years)       | 671/9793 (6.9%)        | 773/9744 (7.9%)   | RR 0.81<br>(0.63 to 1.05) | 15 fewer per 1,000<br>(from 4 more to 29 fewer)  | ⊕⊕○○<br>LOW due to inconsistency and imprecision |

CI, confidence interval; MACE, major adverse cardiovascular events; RCTs, randomized controlled trials; RR, risk ratio

\*Pooled relative risk was estimated by the random-effects model.

<sup>†</sup>GRADE system classifies the quality of evidence into four levels: high, moderate, low, and very low. High quality: we are very confident that the true effect lies close to that of the estimate of the effect. Moderate quality: we are moderately confident that the true effect is likely to be close to the estimate of the effect, but there is a possibility that it is substantially different.

Low quality: our confidence in the effect estimate is limited because the true effect may be substantially different from the estimate of the effect. Very low quality: we have very little confidence in the effect estimate because the true effect is likely to be substantially different from the estimate of effect<sup>2</sup>.

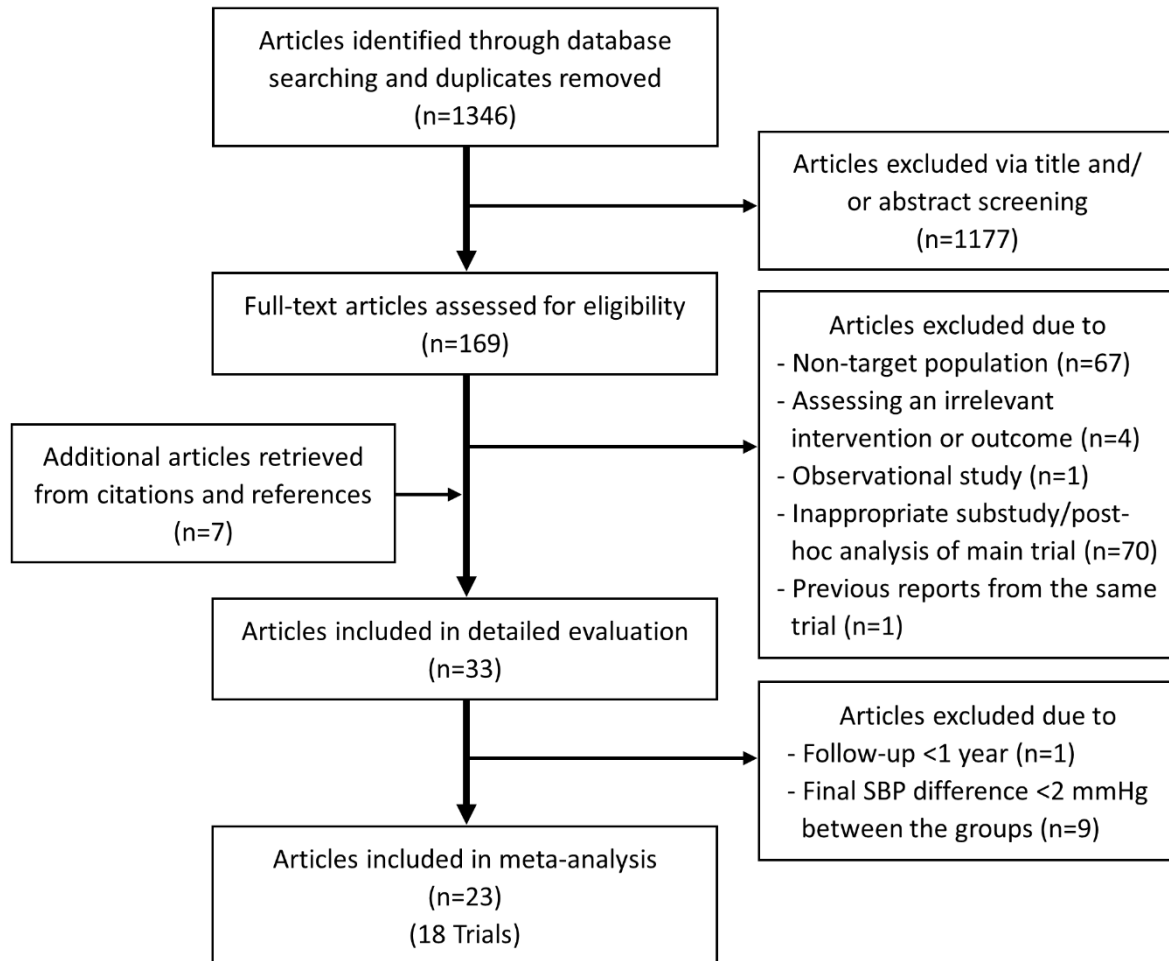

**Supplementary Figure 1. Flow diagram of literature selection**

The flowchart summarizes the results of database searches from inception to December 12, 2016. No further major trials were obtained in the final search (on April 20, 2017). SBP, systolic blood pressure

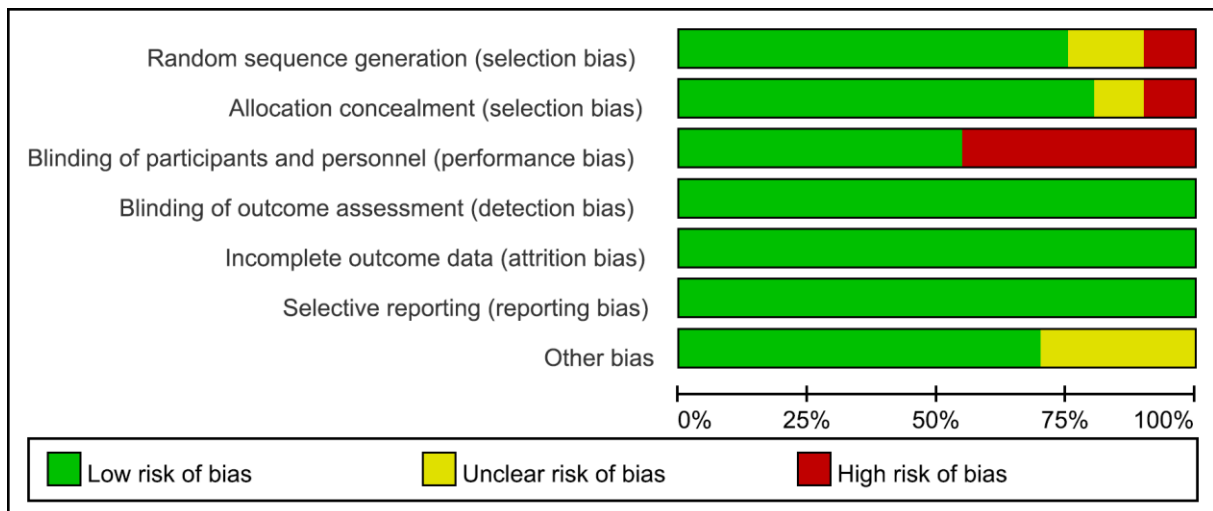

**Supplementary Figure 2. Risk of bias graph for the judgement about each methodological quality item that presented as percentages across all included studies**

|                         | Random sequence generation (selection bias) | Allocation concealment (selection bias) | Blinding of participants and personnel (performance bias) | Blinding of outcome assessment (detection bias) | Incomplete outcome data (attrition bias) | Selective reporting (reporting bias) | Other bias |
|-------------------------|---------------------------------------------|-----------------------------------------|-----------------------------------------------------------|-------------------------------------------------|------------------------------------------|--------------------------------------|------------|
| ASCOT-BPLA, 2011        | +                                           | +                                       | +                                                         | +                                               | +                                        | +                                    | +          |
| EWPHE, 1985             | ?                                           | +                                       | +                                                         | +                                               | +                                        | +                                    | +          |
| FEVER, 2011             | +                                           | +                                       | +                                                         | +                                               | +                                        | +                                    | ?          |
| HEP, 1986               | +                                           | +                                       | +                                                         | +                                               | +                                        | +                                    | ?          |
| HYVET, 2008             | +                                           | +                                       | +                                                         | +                                               | +                                        | +                                    | +          |
| HYVET-COG, 2008         | +                                           | +                                       | +                                                         | +                                               | +                                        | +                                    | +          |
| HYVET pilot, 2003       | +                                           | +                                       | +                                                         | +                                               | +                                        | +                                    | ?          |
| JATOS, 2008             | +                                           | +                                       | +                                                         | +                                               | +                                        | +                                    | +          |
| MRC-2, 1992             | +                                           | ?                                       | +                                                         | +                                               | +                                        | +                                    | ?          |
| SCOPE, 2003             | +                                           | +                                       | +                                                         | +                                               | +                                        | +                                    | +          |
| SHEP, 1991              | +                                           | +                                       | +                                                         | +                                               | +                                        | +                                    | +          |
| SHEP pilot, 1989        | ?                                           | +                                       | +                                                         | +                                               | +                                        | +                                    | ?          |
| SPRINT, 2016            | +                                           | +                                       | +                                                         | +                                               | +                                        | +                                    | +          |
| STONE, 1996             | +                                           | +                                       | +                                                         | +                                               | +                                        | +                                    | +          |
| STOP-Hypertension, 1991 | ?                                           | +                                       | +                                                         | +                                               | +                                        | +                                    | +          |
| Syst-China, 1998        | +                                           | +                                       | +                                                         | +                                               | +                                        | +                                    | +          |
| Syst-Eur, 1997          | +                                           | +                                       | +                                                         | +                                               | +                                        | +                                    | +          |
| Syst-Eur, 2002          | +                                           | +                                       | +                                                         | +                                               | +                                        | +                                    | +          |
| VALISH, 2010            | +                                           | +                                       | +                                                         | +                                               | +                                        | +                                    | +          |
| Wei et al, 2013         | +                                           | ?                                       | +                                                         | +                                               | +                                        | +                                    | ?          |

**Supplementary Figure 3. Risk of bias summary for all of the judgements about methodological quality for all included studies**

### Coronary heart disease

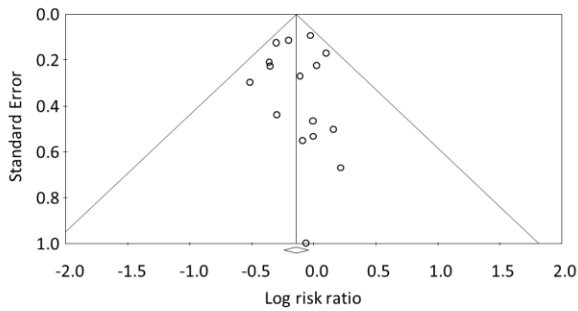

Egger's regression asymmetry test  
( $P = 0.99$ , intercept = 0.003, 95% CI = -0.83 to 0.84)

### Stroke

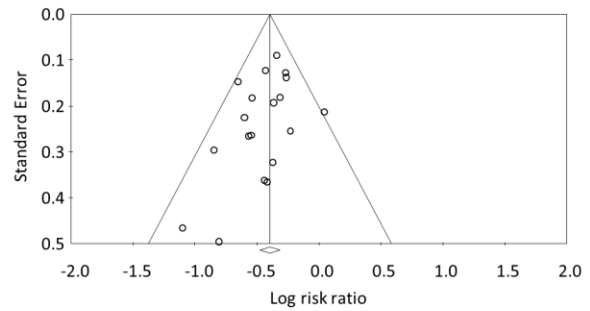

Egger's regression asymmetry test  
( $P = 0.11$ , intercept = -0.86, 95% CI = -1.94 to 0.22)

### Heart failure

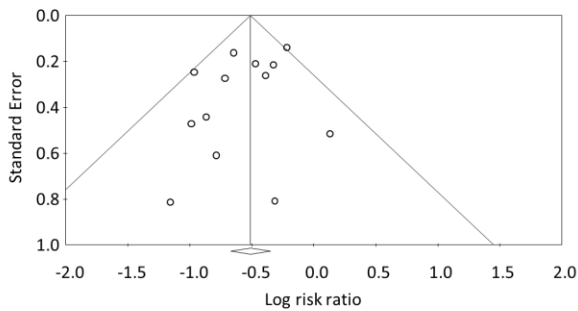

Egger's regression asymmetry test  
( $P = 0.24$ , intercept = -0.77, 95% CI = -2.15 to 0.61)

### Cardiovascular death

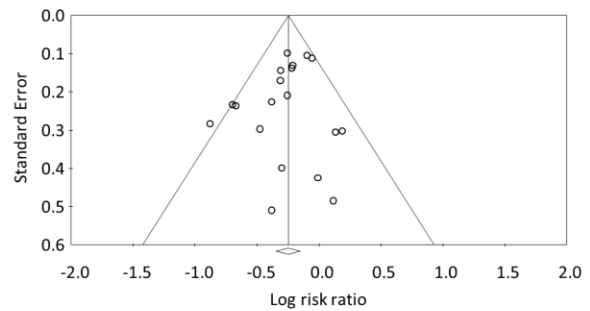

Egger's regression asymmetry test  
( $P = 0.30$ , intercept = -0.61, 95% CI = -1.83 to 0.60)

### MACE

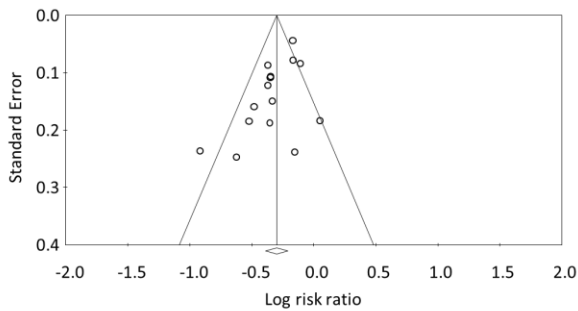

Egger's regression asymmetry test  
( $P = 0.02$ , intercept = -1.75, 95% CI = -3.14 to -0.37)

### Renal failure

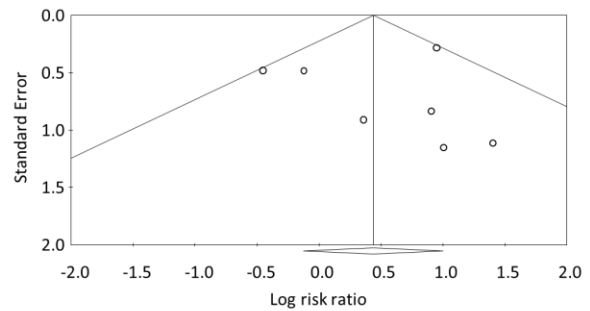

Egger's regression asymmetry test  
( $P = 0.88$ , intercept = -0.17, 95% CI = -2.96 to 2.61)

### All-cause death

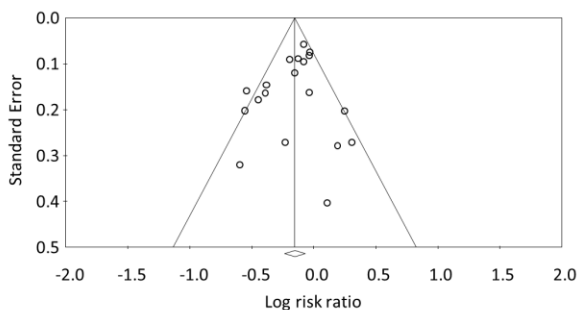

Egger's regression asymmetry test  
( $P = 0.28$ , intercept = -0.75, 95% CI = -2.16 to 0.67)

### Dementia

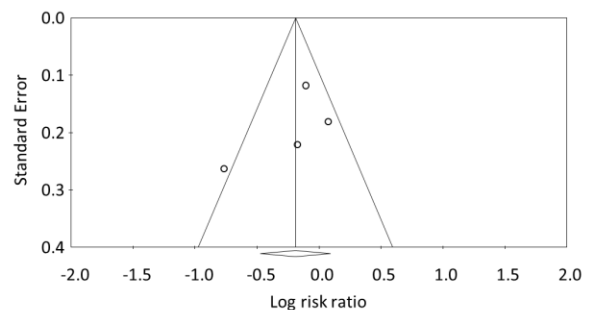

Egger's regression asymmetry test  
( $P = 0.43$ , intercept = -2.53, 95% CI = -13.53 to 8.48)

## Supplementary Figure 4. Funnel plots and Egger's regression asymmetry test for assessing publication bias

Publication bias was not evaluated for cognitive decline because of only a few trials limiting

the power to test this bias. Diamond represents the pooled estimate of log relative risks and its 95% confidence interval that was calculated by using random-effects model. MACE, major adverse cardiovascular events

**A**

**Sample size < 2000**

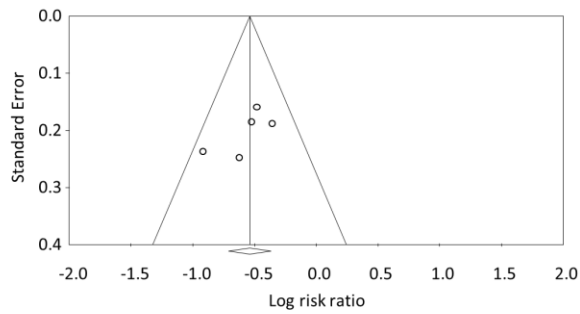

Egger's regression asymmetry test  
( $P = 0.20$ , intercept =  $-3.68$ , 95% CI =  $-10.89$  to  $3.52$ )

**Sample size  $\geq 2000$**

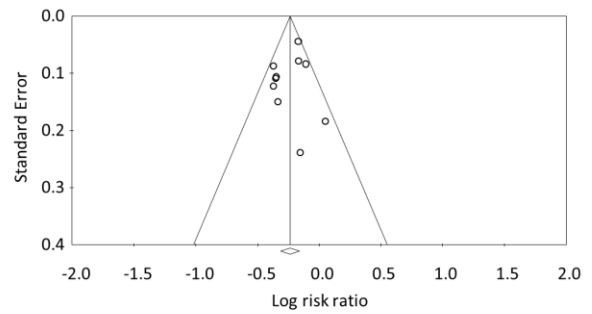

Egger's regression asymmetry test  
( $P = 0.44$ , intercept =  $-0.74$ , 95% CI =  $-2.85$  to  $1.38$ )

**B**

**Impute missing studies using a fixed-effects model**

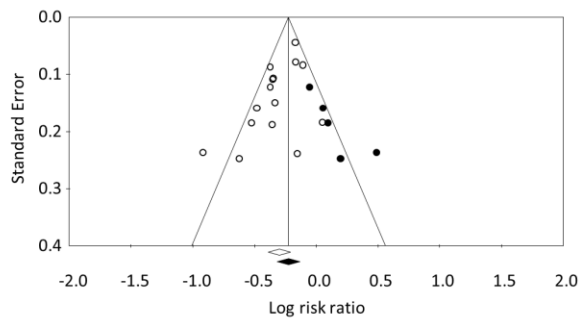

Observed pooled estimate RR =  $0.74$  (95% CI =  $0.68$  to  $0.81$ )  
Adjusted pooled estimate RR =  $0.80$  (95% CI =  $0.73$  to  $0.88$ )

**Impute missing studies using a random-effects model**

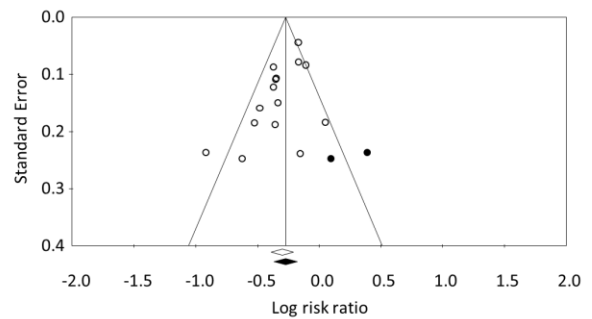

Observed pooled estimate RR =  $0.74$  (95% CI =  $0.68$  to  $0.81$ )  
Adjusted pooled estimate RR =  $0.76$  (95% CI =  $0.69$  to  $0.84$ )

### Supplementary Figure 5. Illustration of funnel plot asymmetry for major adverse cardiovascular events

Heterogeneity derived from distinct treatment effects might lead to funnel plot asymmetry (A). A nonparametric “trim and fill” method was adopted to test and adjust for publication bias and did not draw different conclusion (B). The theoretical missing studies (solid circle) were imputed on the right side of the observed mean effect (open diamond). Solid diamond represents the adjusted pooled estimate of log relative risks and its 95% confidence interval.

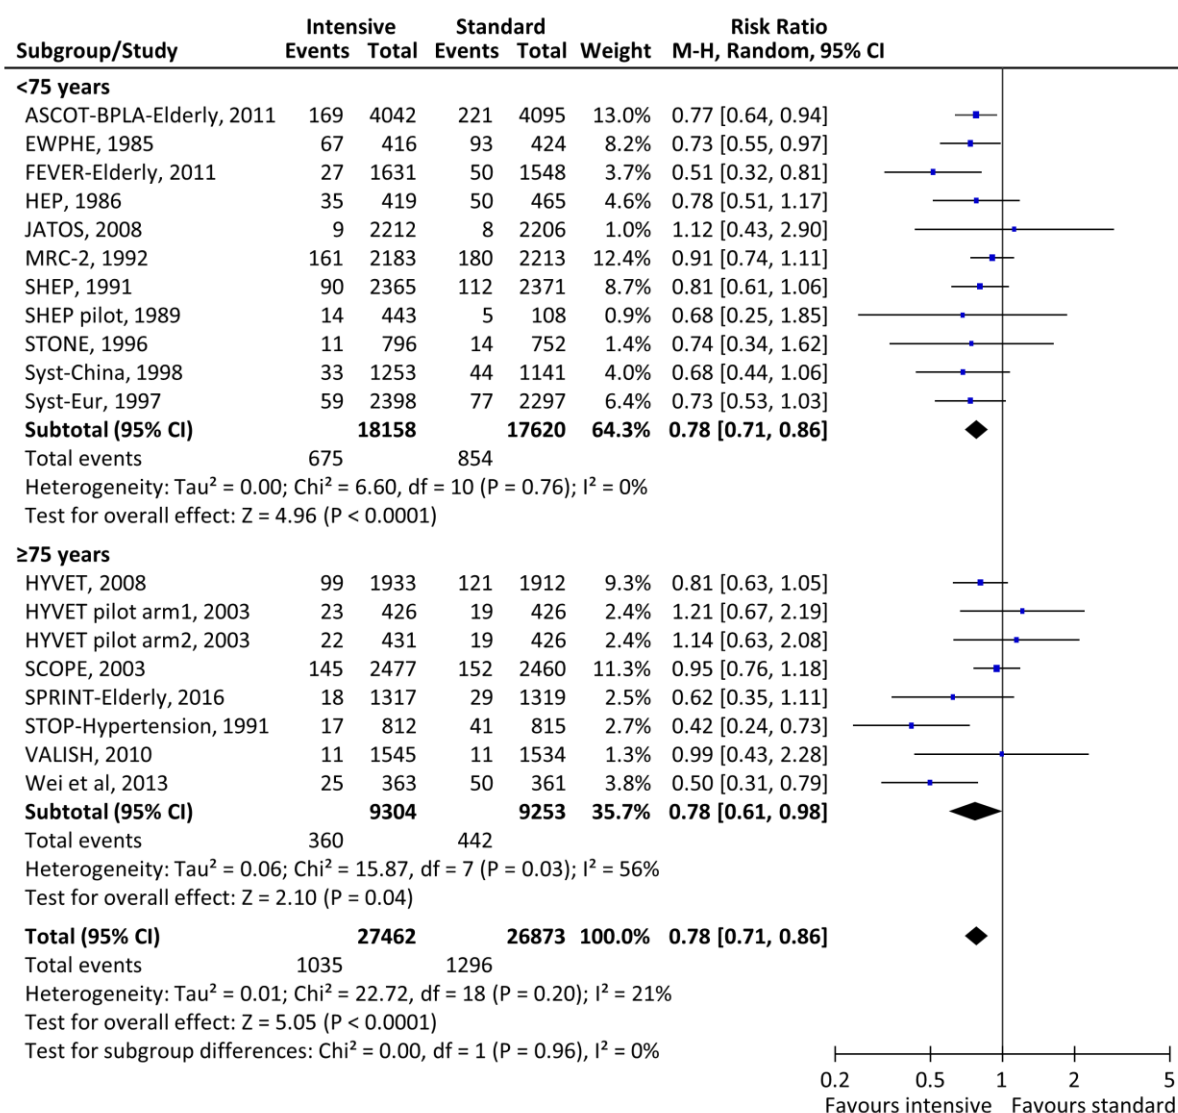

**Supplementary Figure 6. Forest plot of pooled estimates comparing intensive versus standard BP control for cardiovascular death, stratified by baseline mean ages of the included trials**

M-H, Mantel-Haenszel



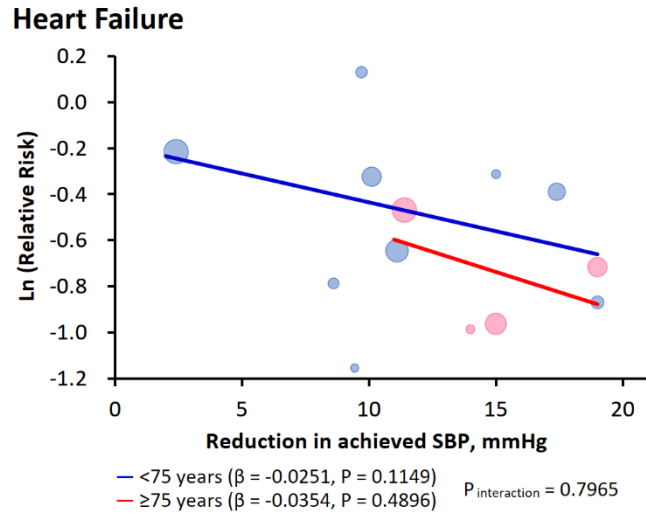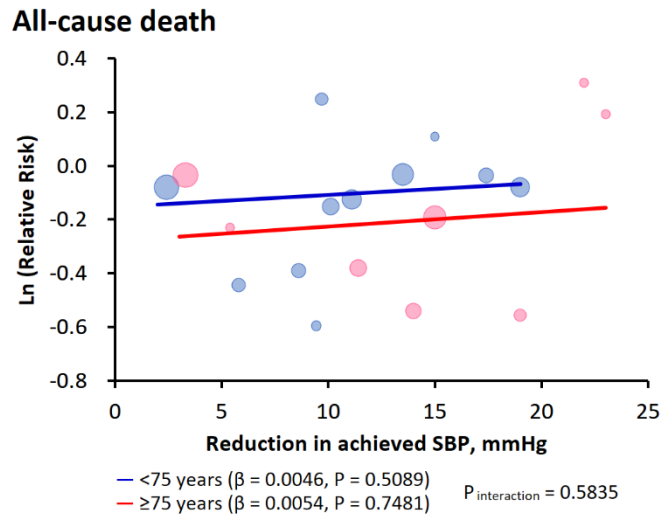

**Supplementary Figure 7. Meta-regression analyses of treatment effect in relation to achieved systolic blood pressure (SBP) reduction for heart failure and all-cause death, stratified by baseline mean ages of the included trials.** The regression fits for two age groups are shown. The size of the circle represents the weight of each trial and is inversely proportional to the standard error of the effect estimate. Ln, natural logarithm

**A**

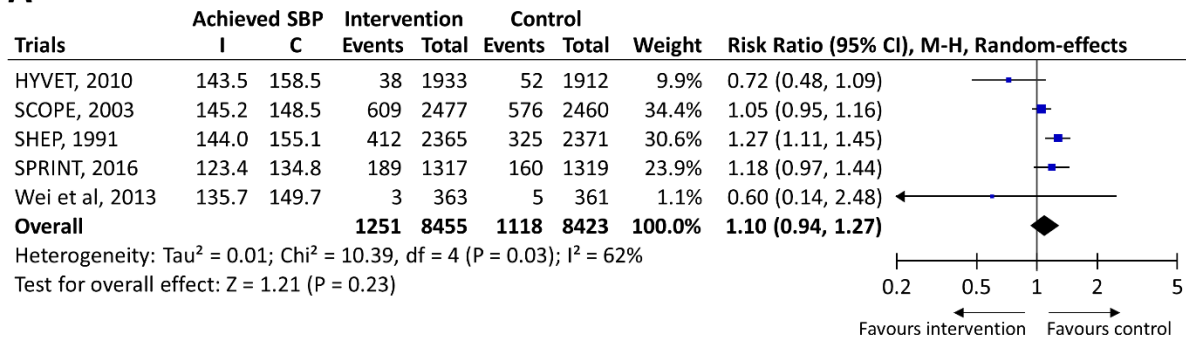

**B**

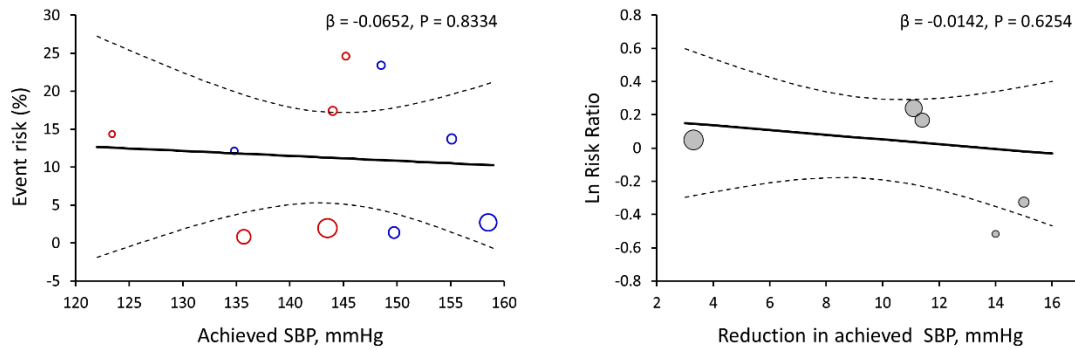

**Supplementary Figure 8. Effects of antihypertensive treatment on reported side effects (A) and the relationship of the risk of reported side effects to achieved systolic blood pressure (SBP) and achieved SBP difference between intensive and standard control groups (B)**

Reported side effects summarized the events of falls, fractures, syncope, hypotension, and electrolyte abnormality. Diamond denote pooled relative risk and 95% confidence interval (top panel). The bottom-left inset in this figure shows meta-regression analysis performed on the data from combining the intensive (colored in red) and standard (colored in blue) control groups, and the bottom-right inset shows meta-regression analysis that regressed the relative risk on the difference in achieved SBP between the intensive and standard control groups. The regression fit (solid line) and 95% confidence interval (dash line) are shown. The size of the circle represents the weight of each trial and is inversely proportional to the standard error of the effect estimate. C, control; I, intensive; Ln, natural logarithm; M-H, Mantel-Haenszel

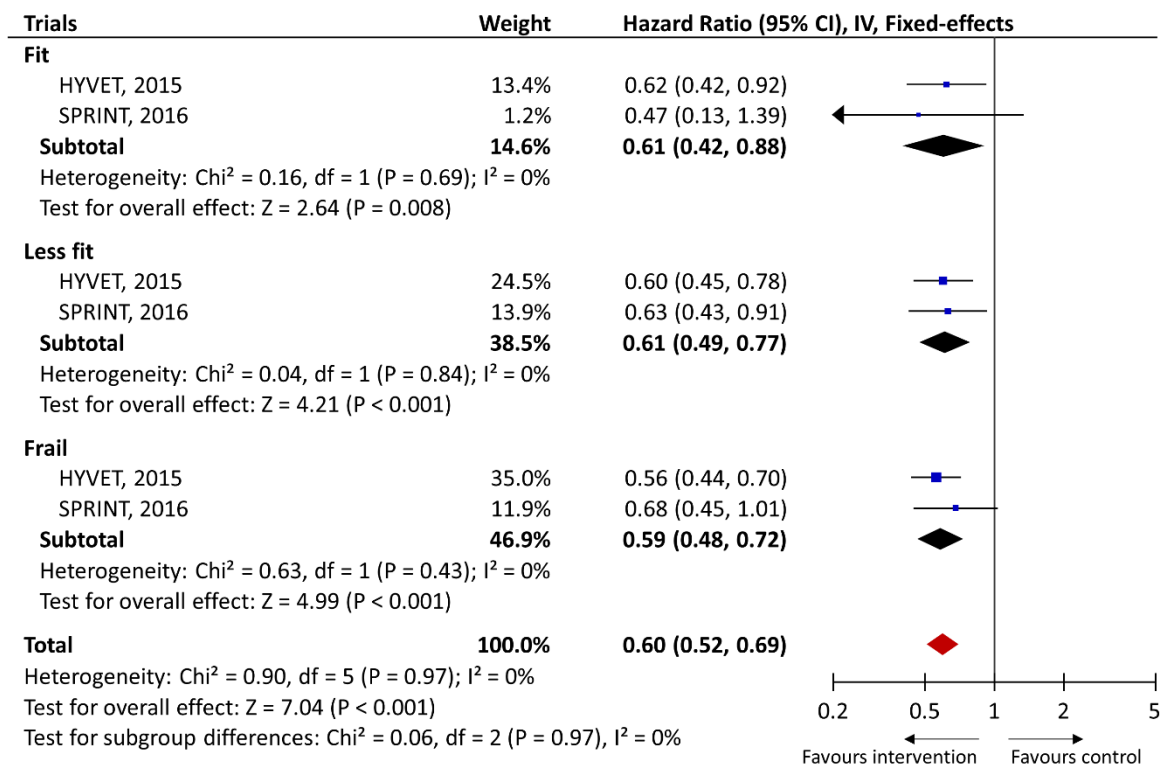

**Supplementary Figure 9. Effects of antihypertensive treatment on cardiovascular events, stratified by frailty status**

Frailty status classified using frailty index (FI) as fit ( $\text{FI} \leq 0.10$ ), less fit ( $0.10 < \text{FI} \leq 0.21$ ), or frail ( $\text{FI} > 0.21$ ). IV, Inverse Variance

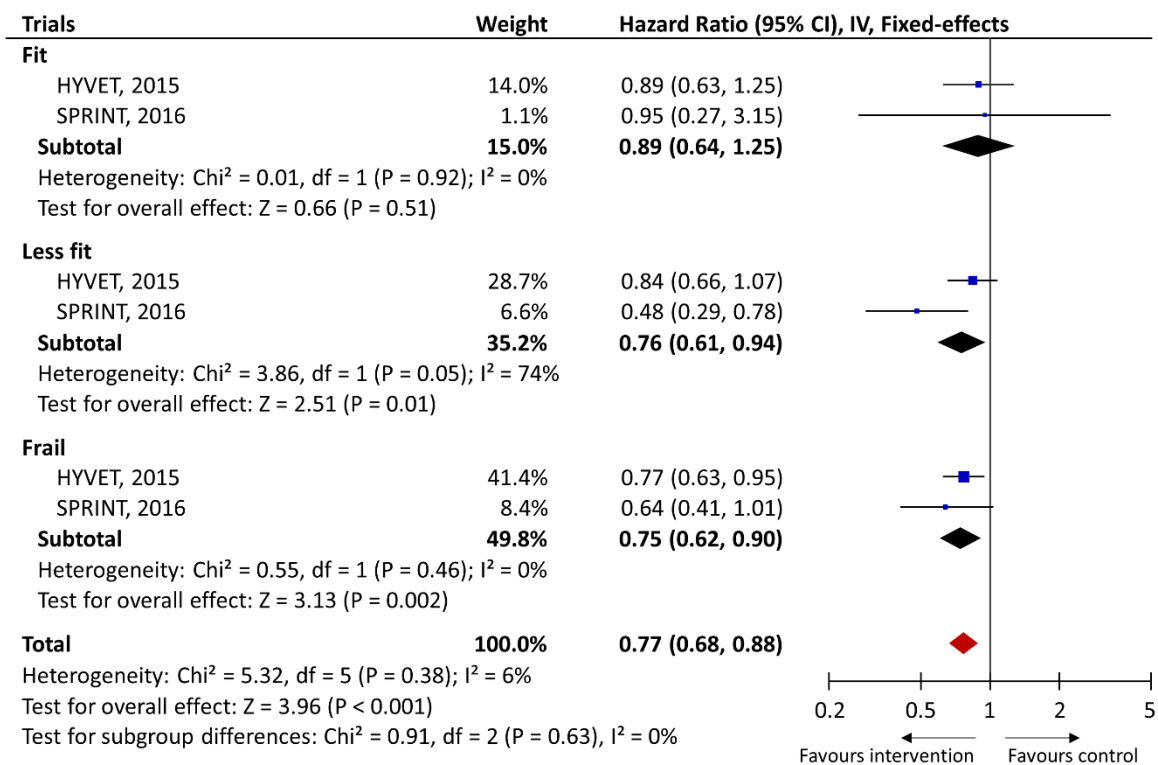

**Supplementary Figure 10. Effects of antihypertensive treatment on all-cause death, stratified by frailty status**

Frailty status classified using frailty index (FI) as fit ( $\text{FI} \leq 0.10$ ), less fit ( $0.10 < \text{FI} \leq 0.21$ ), or frail ( $\text{FI} > 0.21$ ). IV, Inverse Variance

## References

1. Peters R, Beckett N, Burch L, de Vernejoul MC, Liu L, Duggan J, Swift C, Gil-Extremera B, Fletcher A, Bulpitt C. The effect of treatment based on a diuretic (indapamide) +/- ACE inhibitor (perindopril) on fractures in the Hypertension in the Very Elderly Trial (HYVET). *Age Ageing* 2010; **39**(5): 609-616.
2. Balshem H, Helfand M, Schunemann HJ, Oxman AD, Kunz R, Brozek J, Vist GE, Falck-Ytter Y, Meerpohl J, Norris S, Guyatt GH. GRADE guidelines: 3. Rating the quality of evidence. *J Clin Epidemiol* 2011; **64**(4): 401-406.
